# Supplementary material
Source: PubMed Central journal article supplement (PMC9342961)
Supplement: kiac195_supplementary_data.pdf [file kiac195_supplementary_data.pdf]

## Supplemental Data

### Transcription factors *BBX11* and *HY5* interdependently regulate the molecular and metabolic responses to UV-B

Nikhil Job, Maneesh Lingwan, Shyam K Masakapalli, Sourav Datta

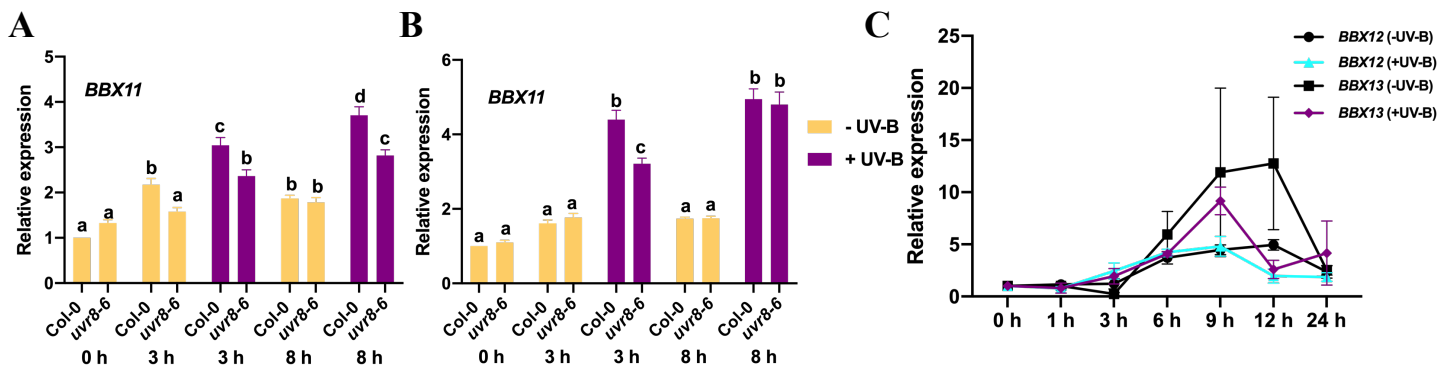

#### Supplemental Figure S1. *BBX12* and *BBX13* mRNA expression is not induced by UV-B and the UV-B mediated induction of *BBX11* is partially dependant on *UVR8*.

qRT-PCR analysis of *BBX11* expression in 5-d-old Col-0 and *uvr8-6* seedlings grown in constant white light and exposed to supplemental UV-B 1 (A) and UV-B 2 (B) (+) or not (-) for 3h and 8 h. GAPDH was used as internal control. Error bars represent SEM, n=3. Statistical groups indicated by letters were determined by two-way ANOVA, with Tukey's test,  $P \leq 0.05$ . (A) RT-qPCR analysis of *BBX12* and *BBX13* expression in 5-d-old Col-0 seedlings grown in constant white light and exposed to supplemental UV-B 2 (+) or not (-) for the indicated time period. GAPDH was used as internal control. Error bars represent SEM, n=3.

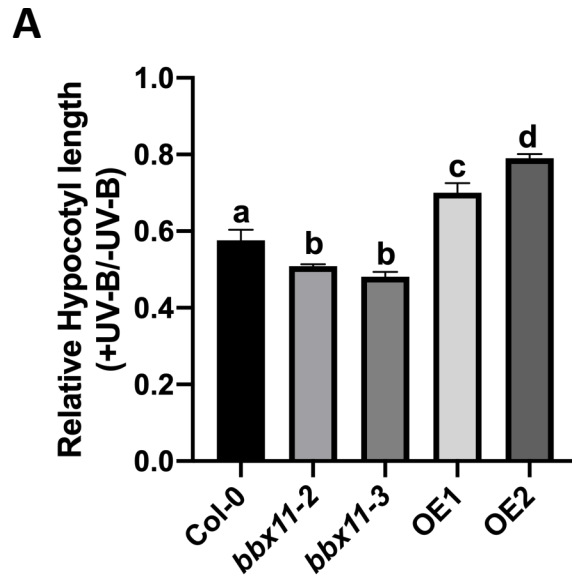

**Supplemental Figure S2. Relative hypocotyl length of loss and gain of function mutants of *BBX11* under UV-B**

(A) Relative hypocotyl length of 5-d-old seedlings of the indicated genotypes grown under constant white light supplemented with UV-B 1 (+) or not (-). Error bar represents SEM, n=3, Statistical groups indicated by letters were determined by one-way ANOVA, with Tukey's test,  $P \leq 0.05$

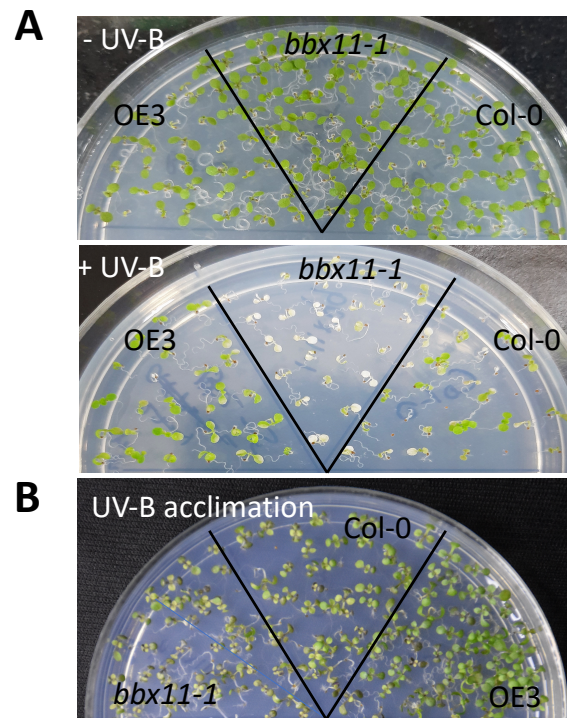

**Supplemental Figure S3. Over expression of *BBX11* enhances protection against UV-B stress**

(A) 4 d-old seedlings of the indicated genotypes grown under constant white light and exposed to supplemental UV-B 3 (+UV-B) or not (-UV-B) for 20 h and allowed to recover under white light for 1 d before imaging. (B) For UV-B acclimation experiment, seedlings of the indicated genotypes grown under constant white light supplemented with UV-B 1 for 5 days and irradiated with UV-B 3 for another 24 hrs allowed to recover under white light for 1 d before imaging.

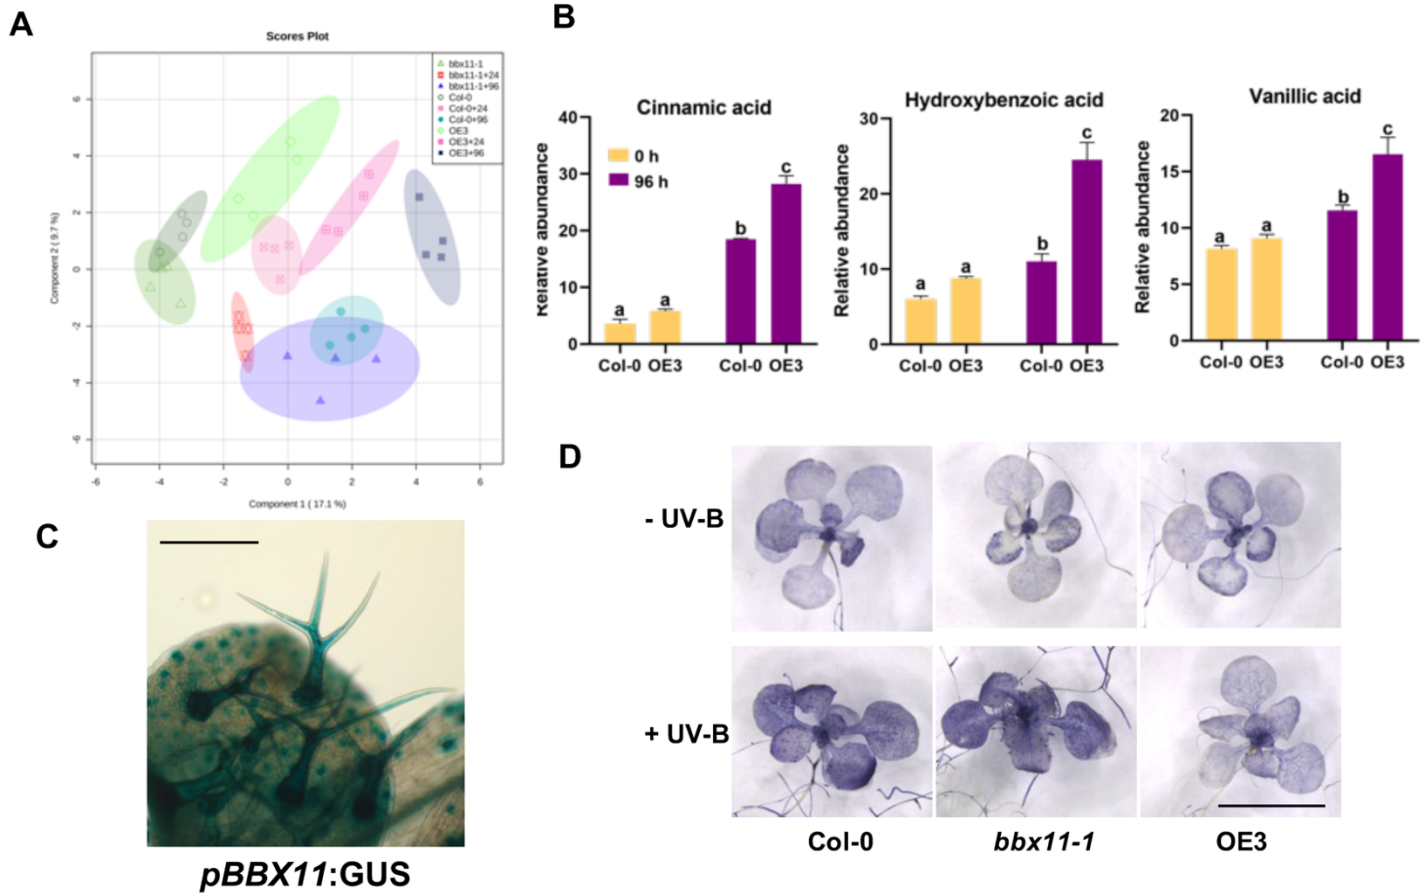

### Supplemental Figure S4. *BBX11* modulates accumulation of photoprotective secondary metabolites

(A) Multivariate analyses using Partial least squares-discriminant analysis (PLS-DA) showing that *Col-0*, *bbx11-1*, and *OE3* alter their metabolome differently after 24 h and 96 h of UV-B irradiation. In PLS-DA, components one and component two plots represent variation in x and y axes, respectively. Ovals covering the replicates represents a 90% confidence interval of metabolome under the given treatment. (B) Relative abundance of the indicated phenolics after in *Col-0*, *bbx11-1* and *OE3* after 96 h of UV-B 3 treatment. Error bars represent SEM, n=3. Statistical groups indicated by letters were determined by one-way ANOVA, with Tukey's test,  $P \leq 0.05$ . (C) histochemical staining of *promBBX11:GUS* seedlings grown for 10 d in constant white light indicating that *BBX11* is expressed in the trichomes. Scale bar- 200  $\mu\text{m}$  (D) Representative images of NBT stained seedlings of *Col-0*, *bbx11-1* and *OE3* grown under constant white light for 14 days before treating with supplemental UV-B 3 or not for 2 d and allowed to recover for another 2 d before staining with NBT. Scale bar- 5mm

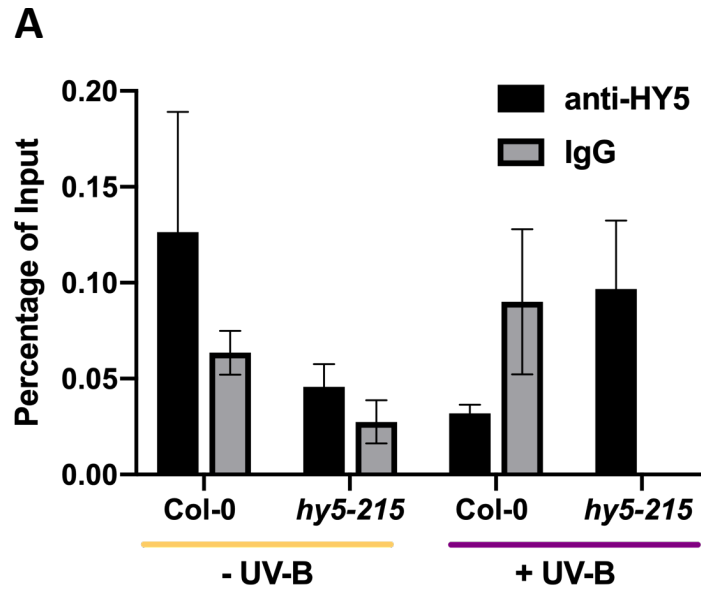

**Supplemental Figure S5. HY5 directly binds to the promoter of *BBX11***

(A) ChIP-qPCR analyses of HY5 binding to the *BBX11* promoter in vivo. 14-d-old Col-0 and *hy5-215* seedlings grown in constant white light and exposed to supplemental UV-B 3 (+) or not (-) for 3 h before crosslinking. DNA-protein complexes were immunoprecipitated using antibodies against HY5 (anti-HY5) and rabbit IgG (negative control). ChIP DNA was quantified by qPCR with primers specific to the previously known HY5 binding site. Error bar represents SEM, n=3

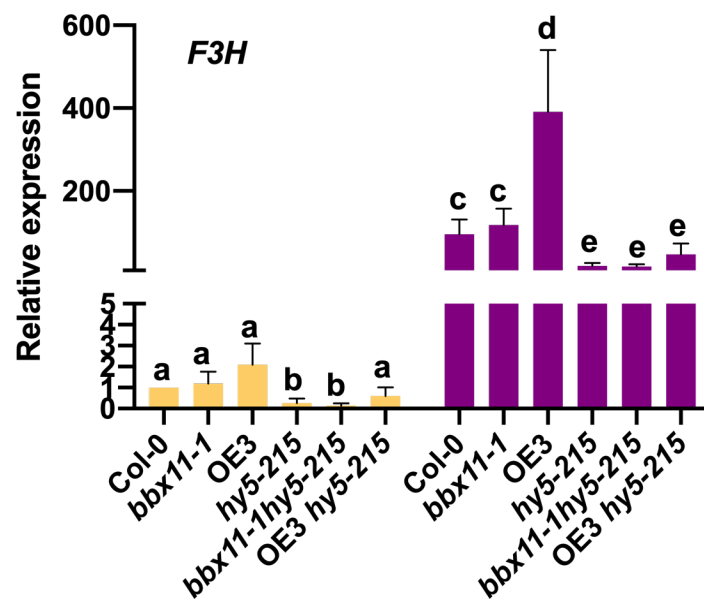

**Supplemental Figure S6. Expression of *F3H* is upregulated in *OE3* seedlings overexpressing *BBX11***

RT-qPCR analysis of *F3H* (A) in 5-d-old seedlings grown in constant white light and exposed to supplemental UV- B 2 (+) or not (-) for the 4 h. GAPDH was used as internal control. Error bars represent SEM, n=3. Statistical groups indicated by letters were determined by one-way ANOVA, with Tukey's test,  $P \leq 0.05$ .

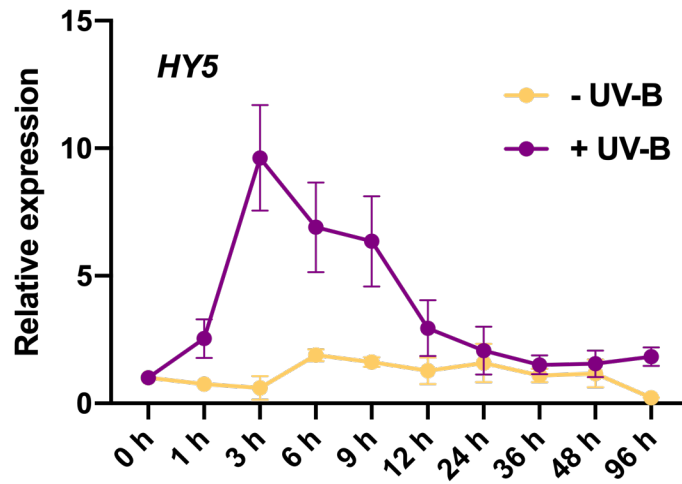

**Supplemental Figure S7.**

***HY5* is an early UV-B inducible gene**

RT-qPCR analysis of *HY5* expression in 5-d-old Col-0 seedlings grown in constant white light and exposed to supplemental UV-B 2 (+) or not (-) for the indicated time period. GAPDH was used as internal control. Error bars represent SEM, n=3

**Supplemental Table S1. List of primers used in this study**

| <b>Primer name</b>                      | <b>Primer sequence (5' - 3')</b> |
|-----------------------------------------|----------------------------------|
| BBX11 RT-qPCR FW                        | GCGGGTCTGGGTAATCATAAC            |
| BBX11 RT-qPCR RV                        | CTGGATAGTCCACGGAGCTG             |
| promBBX11 ChiP HY5 binding site FW qPCR | CAAAGTCCTTTTTTTTCGTTTG           |
| promBBX11 ChiP HY5 binding site RV qPCR | GTAATAAGATCATAACTAATGAAGG        |
| promBBX11 ChiP 3' UTR FW qPCR           | GAGCAAGAAGGGCTTGATG              |
| promBBX11 ChiP 3' UTR RV qPCR           | AGAGTGAAAGCTGCGACG               |
| BBX12 RT-qPCR FW                        | TGCTGCCATTCACCTCGCATA            |
| BBX12 RT-qPCR RV                        | ATCAGCATTCGTTACCGCCA             |
| BBX13 RT-qPCR FW                        | TGAGGAGATCAATGGTGGCG             |
| BBX13 RT-qPCR RV                        | ACTCGTATCCTCAGGTCCCC             |
| ELIP1 RT-qPCR FW                        | GAAGTCACCATCTCCTCCTCCTC          |
| ELIP1 RT-qPCR RV                        | CCAACGCCGCAACGAATCC              |
| ELIP2 RT-qPCR FW                        | GGATCAACGGGAGACTAGCA             |
| ELIP2 RT-qPCR RV                        | CCTTTTGACTTTGCCTCTGC             |
| UVR2 RT-qPCR FW                         | TAAAGGGTTTGCGTCAGCTT             |
| UVR2 RT-qPCR RV                         | CATCTTTACAACGCCGGATT             |
| CHS RT-qPCR FW                          | TCGGTCAGGCTCTTTTCAGT             |
| CHS RT-qPCR RV                          | GGAGATGGAAGGTGAGACCA             |
| CHI RT-qPCR FW                          | CATCGATCCTCTTCGCTCTC             |
| CHI RT-qPCR RV                          | AGGTGACACACCGTTCTTCC             |
| F3H RT-qPCR FW                          | ATGGCTTCCAGGAAGTTGACTGAGCTA      |
| F3H RT-qPCR RV                          | GATCTGACGGCAGATCAC               |
| SOD1 RT-qPCR FW                         | GGTTCCATGTCCATGCTCT              |
| SOD1 RT-qPCR RV                         | ATTGTGAAGGTGGCAGTTCC             |
| UVR3 RT-qPCR FW                         | GACAACCCGGCTCTTGAATA             |
| UVR3 RT-qPCR RV                         | AAAGCAACCGTGAACC                 |
| CAT2 RT-qPCR FW                         | AAGTATCCAACCTCCGCCTGCTG          |
| CAT2 RT-qPCR RV                         | TGGATGAATCGTTCTTGCCTCTC          |
| RUP1 RT-qPCR FW                         | CTCTCTTCCGCGTTGTTTC              |
| RUP1 RT-qPCR RV                         | CGTCACGTGACTCTAACAAAGAG          |
| RUP2 RT-qPCR FW                         | CTGAATTCGATCCCACTGATAACA         |
| RUP2 RT-qPCR RV                         | CAGATGTAATATTCGCAGGCG            |
| GAPDH RT-qPCR FW                        | TTGGTGACAACAGGTCAAGCA            |
| GAPDH RT-qPCR RV                        | AAACTTGTGCTCAATGCAATC            |
| HY5 RT-qPCR FW                          | AAGAGAACAAGCGGCTGAAGAGG          |
| HY5 RT-qPCR RV                          | TTCTCGTTCTGAAGAGTAGAGAGTCGC      |
